# Supplementary material for: Has the 2022 Hunga eruption impacted the noctilucent cloud season in 2023/24 and 2024?
Source: Copernicus journal article supplement (doi:10.5194/egusphere-2024-2165), 2024-10-02
Supplement: Supplementary file 1 [file egusphere-2024-2165-supplement.pdf]

# Has the 2022 Hunga eruption impacted the noctilucent cloud season in 2023/24 and 2024?

Sandra Wallis<sup>1</sup>, Matthew DeLand<sup>2</sup>, and Christian von Savigny<sup>1</sup>

<sup>1</sup>Institute of Physics, University of Greifswald, Felix-Hausdorff-Str. 6, 17489 Greifswald, Germany

<sup>2</sup>Science Systems and Applications Inc., Lanham, Maryland, USA

**Correspondence:** Sandra Wallis (sandra.wallis@uni-greifswald.de)

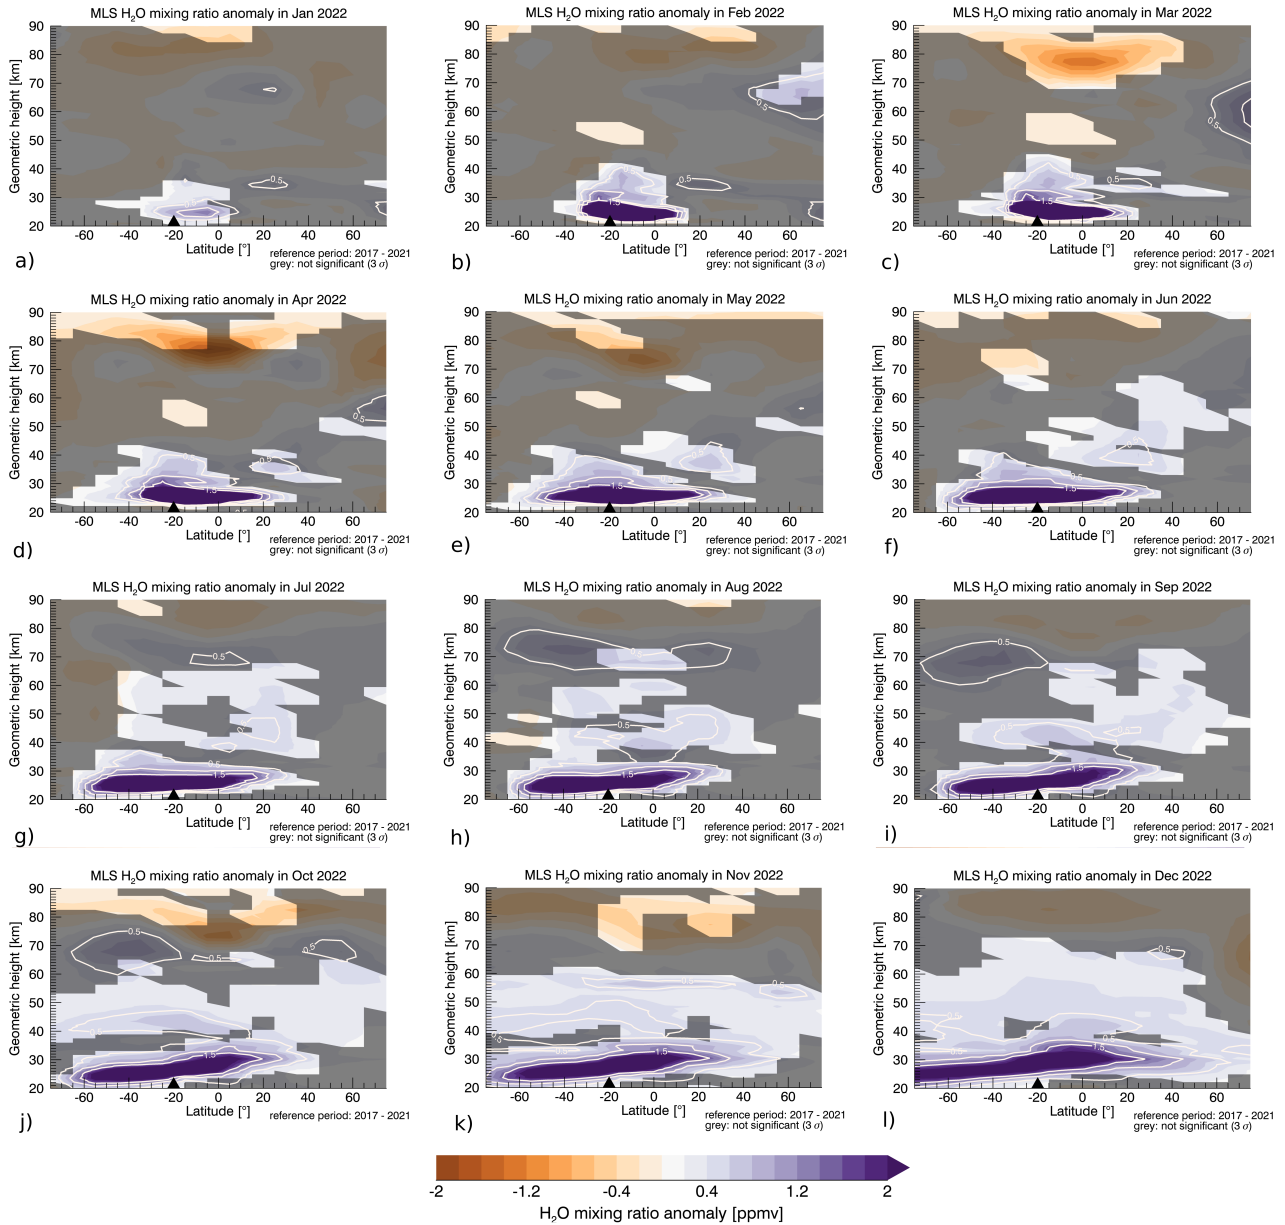

**Figure S1.** Monthly mean water vapour mixing ratio anomaly from MLS data for January to December 2022 (a - l). The reference period is 2017 - 2021 and anomalies that are less than 3 standard deviation of the reference period are considered not significant and marked with a dark grey colour. The triangle denotes the latitude position of the Hunga Tonga volcano.

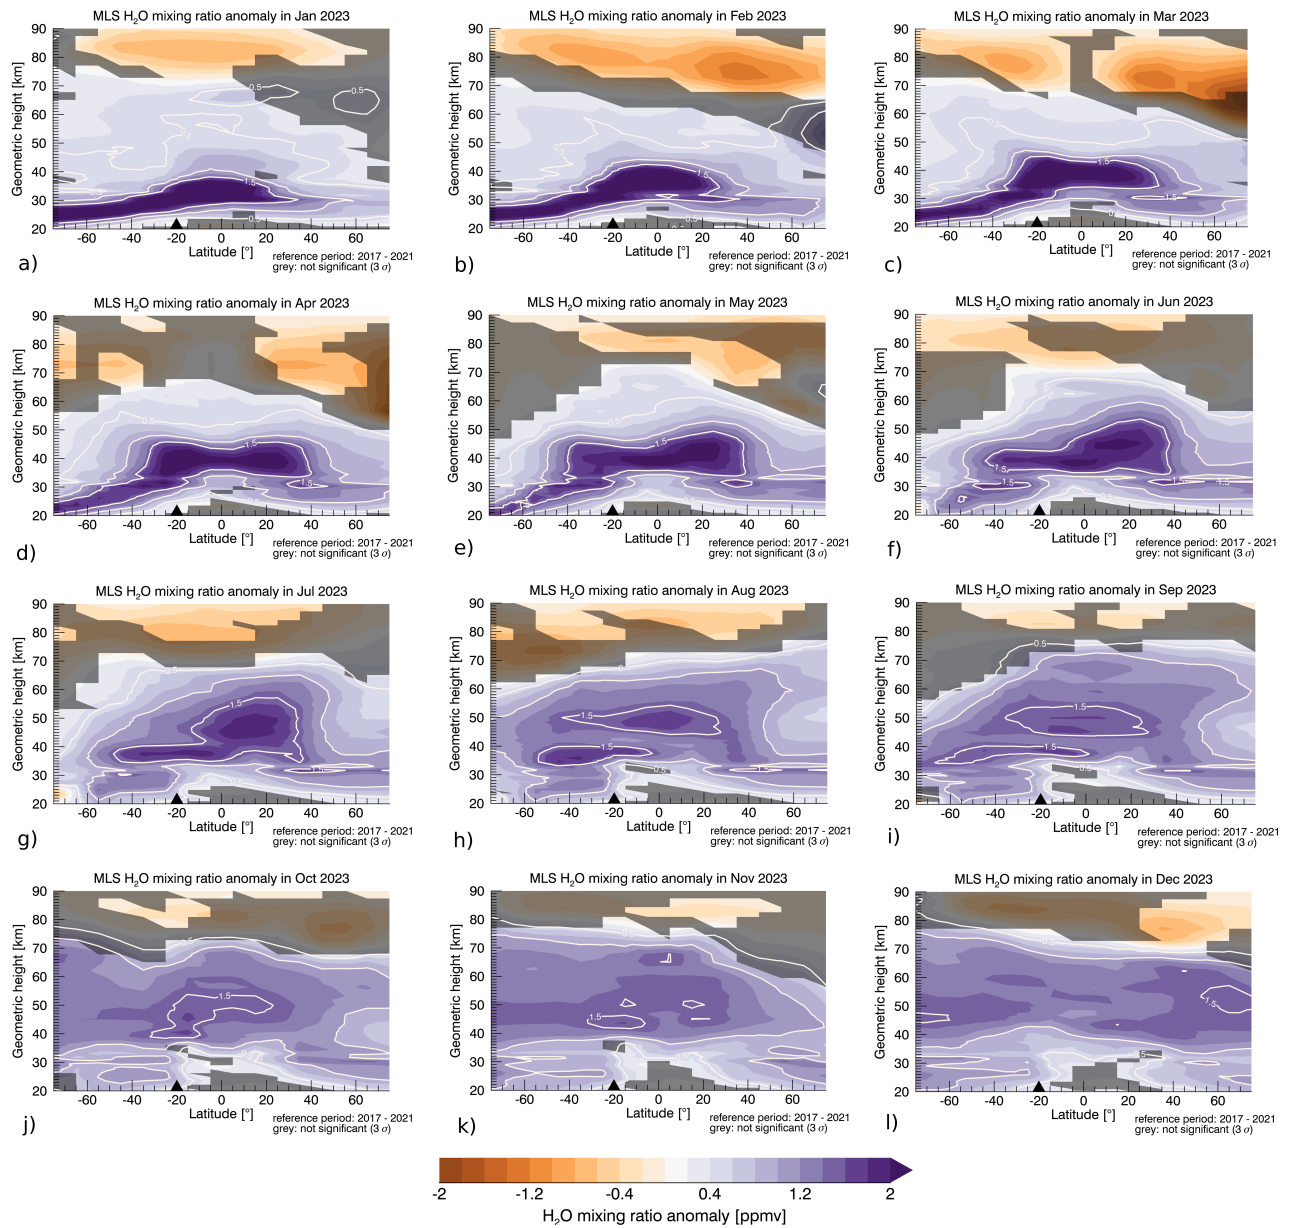

**Figure S2.** The same as in Figure S1, but for 2023.

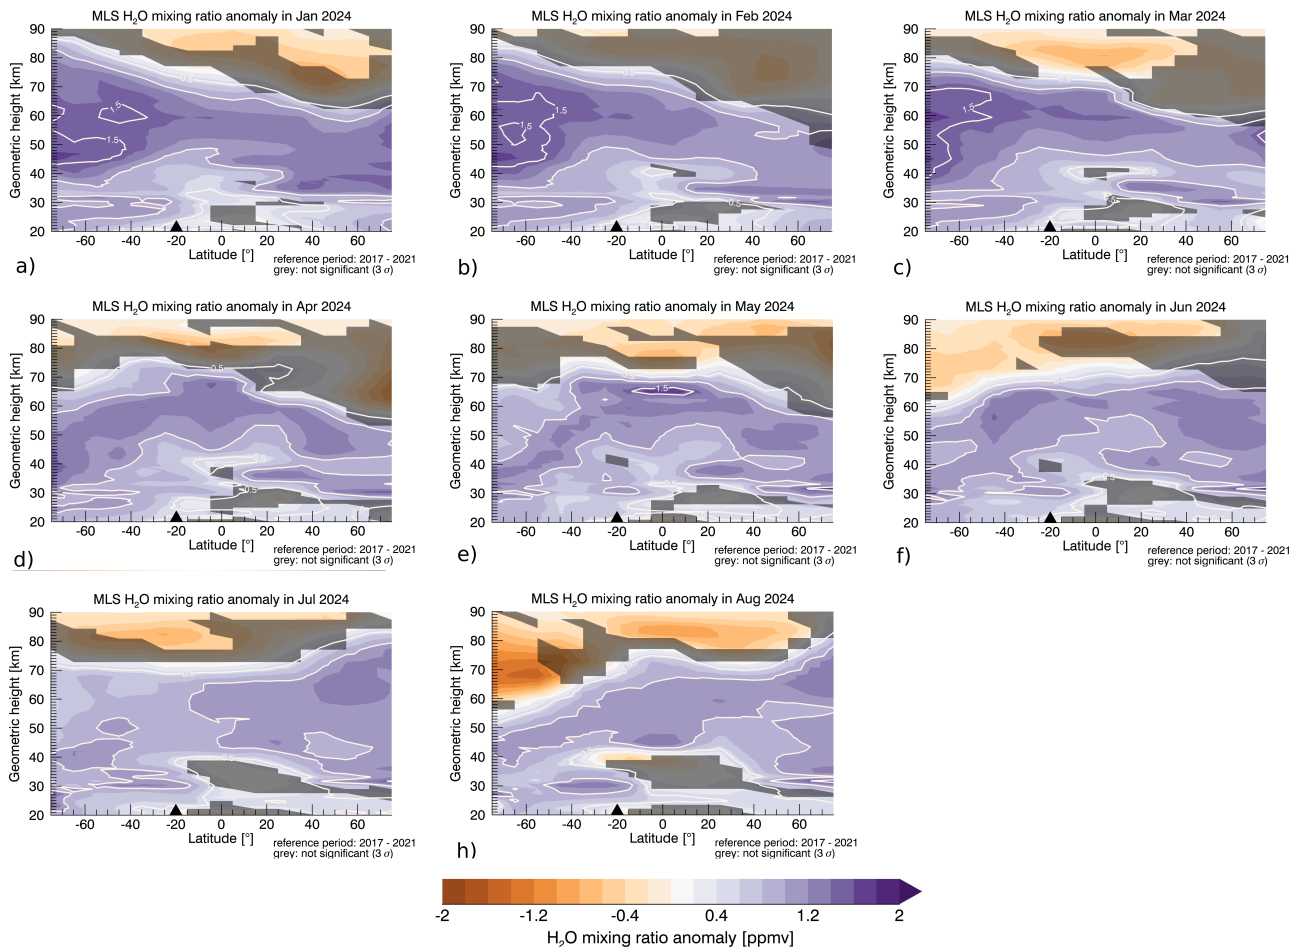

**Figure S3.** The same as in Figure S1, but for 2024.

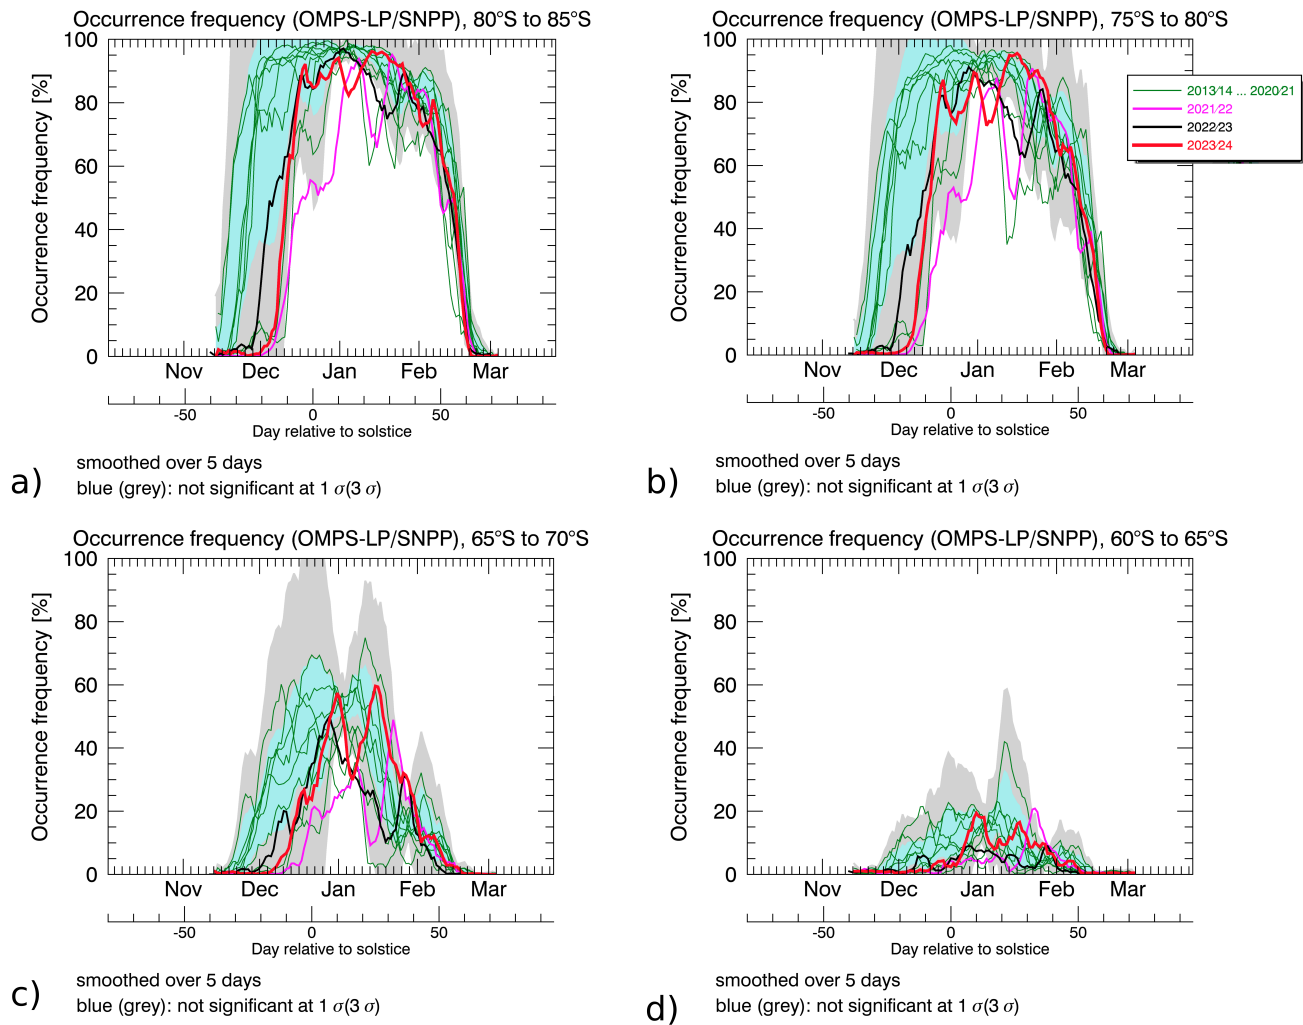

**Figure S4.** NLC occurrence frequency from OMPS-LP for latitudes between 85°S - 65°S. The thick lines indicates the occurrence frequency for the SH 2021/22 (magenta), 2022/23 (black) and 2023/24 (red) seasons, respectively. All seasons before are displayed as thin green lines. The blue (grey) shaded region contains the averaged occurrence frequency for the years 2016/17 to 2020/21  $\pm$  one (three) standard deviation from this period. The day of solstice is December 21.

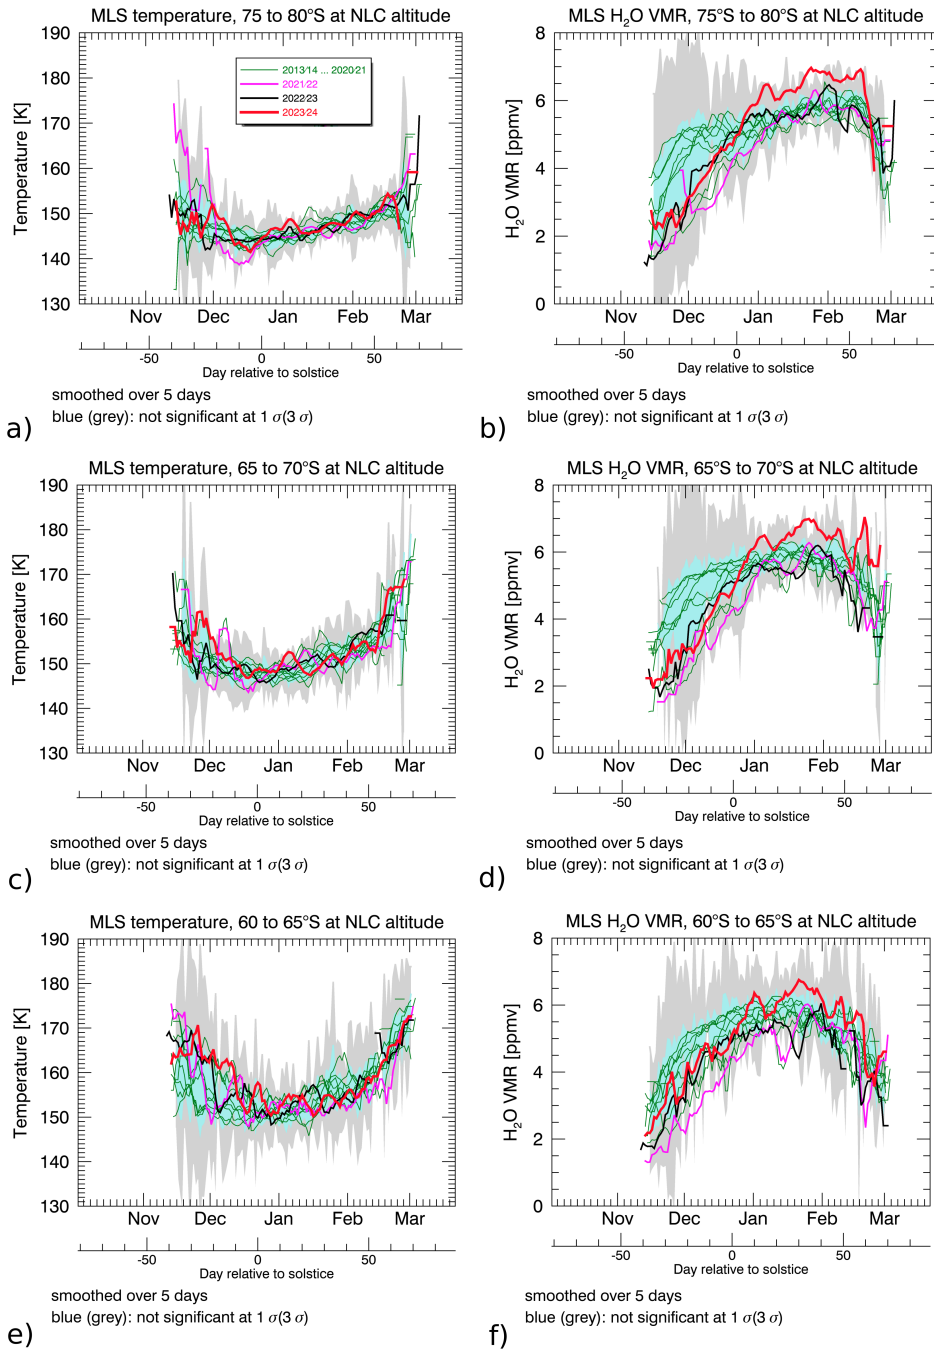

**Figure S5.** MLS temperature between 75°S - 80°S (a), 65°S - 70°S (c) and 60°S - 65°S (e) at NLC altitude determined from OMPS-LP measurements. The thick lines indicates the occurrence frequency for the SH 2021/22 (magenta), 2022/23 (black) and 2023/24 (red) seasons, respectively. All seasons before are displayed as thin green lines. Blue (grey) areas indicate the averaged temperature from 2016/17 to 2020/21  $\pm$  one (three) standard deviation. b), d) and f) depict the same latitude bins for MLS water vapour mixing ratios.

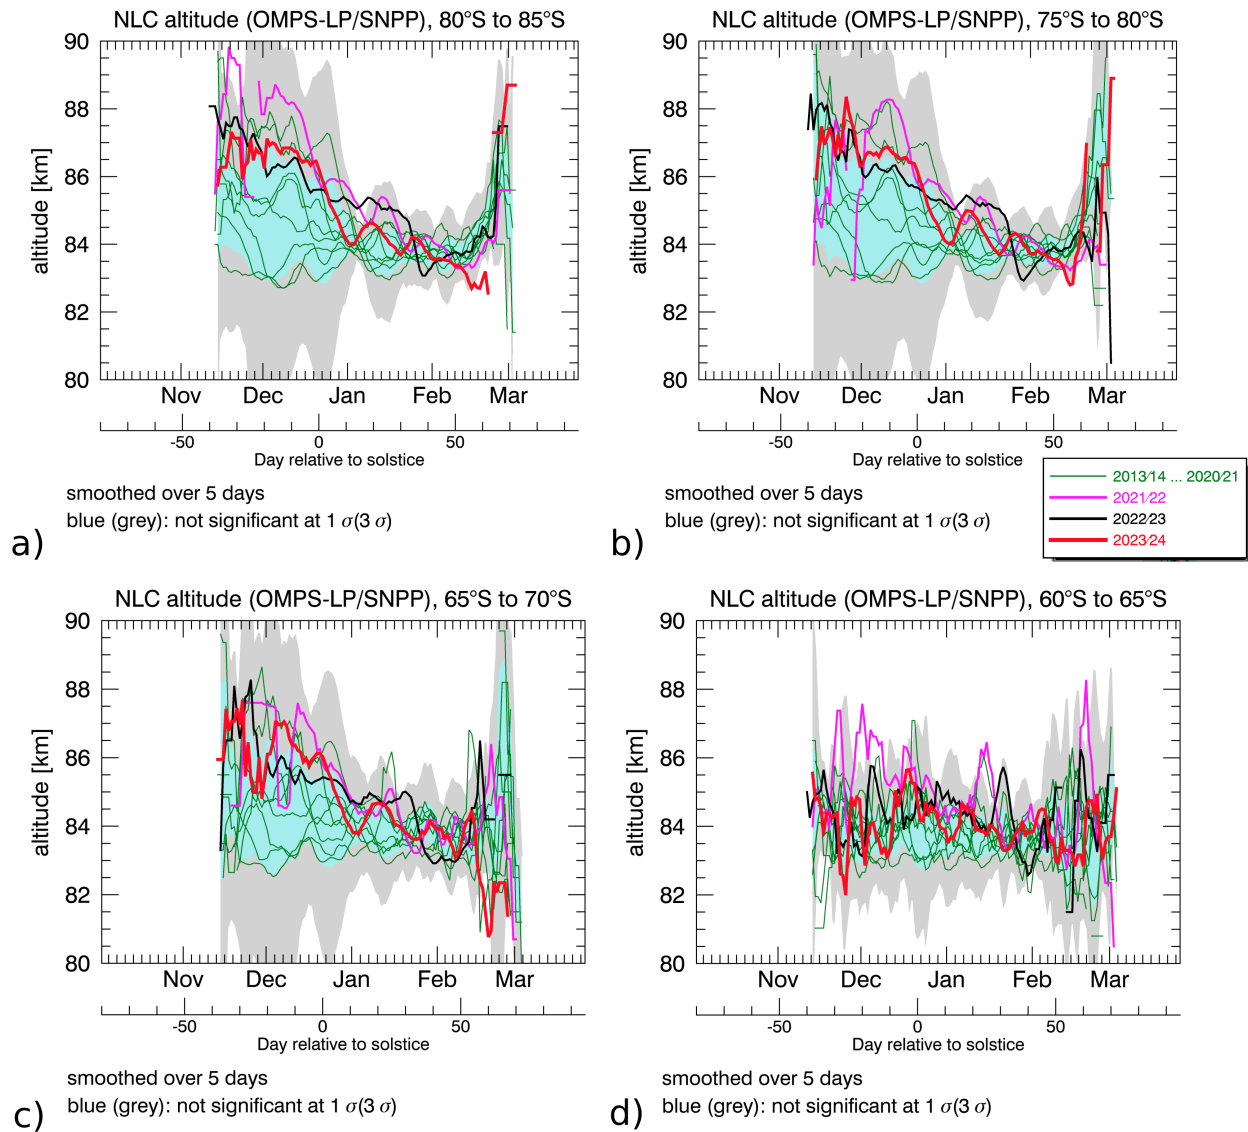

**Figure S6.** Altitude of the NLCs determined from OMPS-LP measurements for 80°S - 65°S (a - d). The thick red line shows the 2023/24 season. Blue (grey) areas indicate the mean NLC altitude from 2016/17 to 2020/21  $\pm$  one (three) standard deviation.

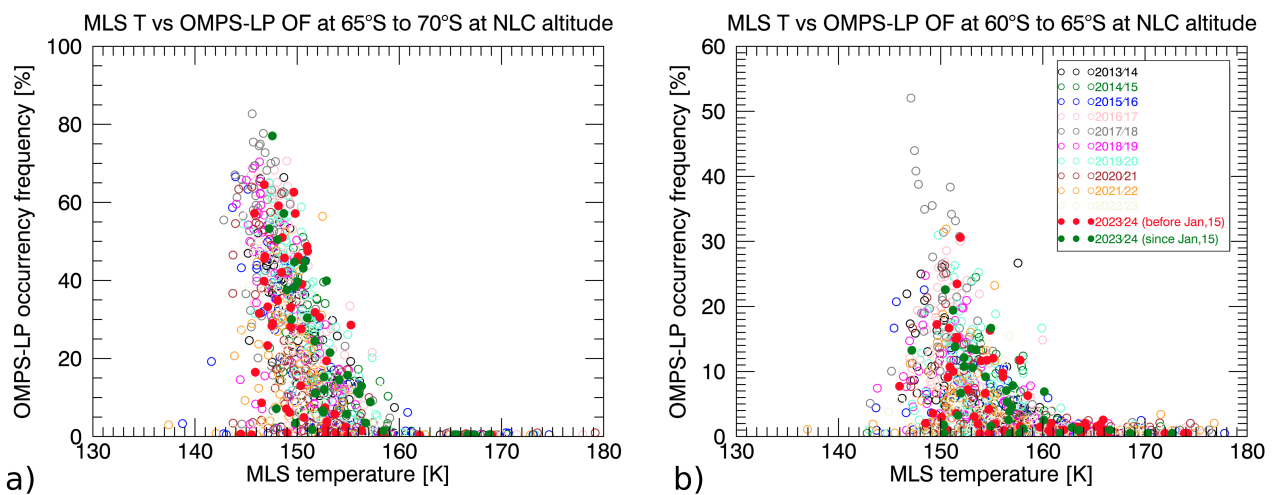

**Figure S7.** Scatterplot for OMPS-LP occurrence frequency versus MLS temperature at NLC altitude (determined from OMPS-LP measurements) for 65°S - 70°S and 60°S - 65°S. The measurements for 2023/24 are highlighted with filled circles using a red colour for measurements before January 15 and a green colour afterwards.



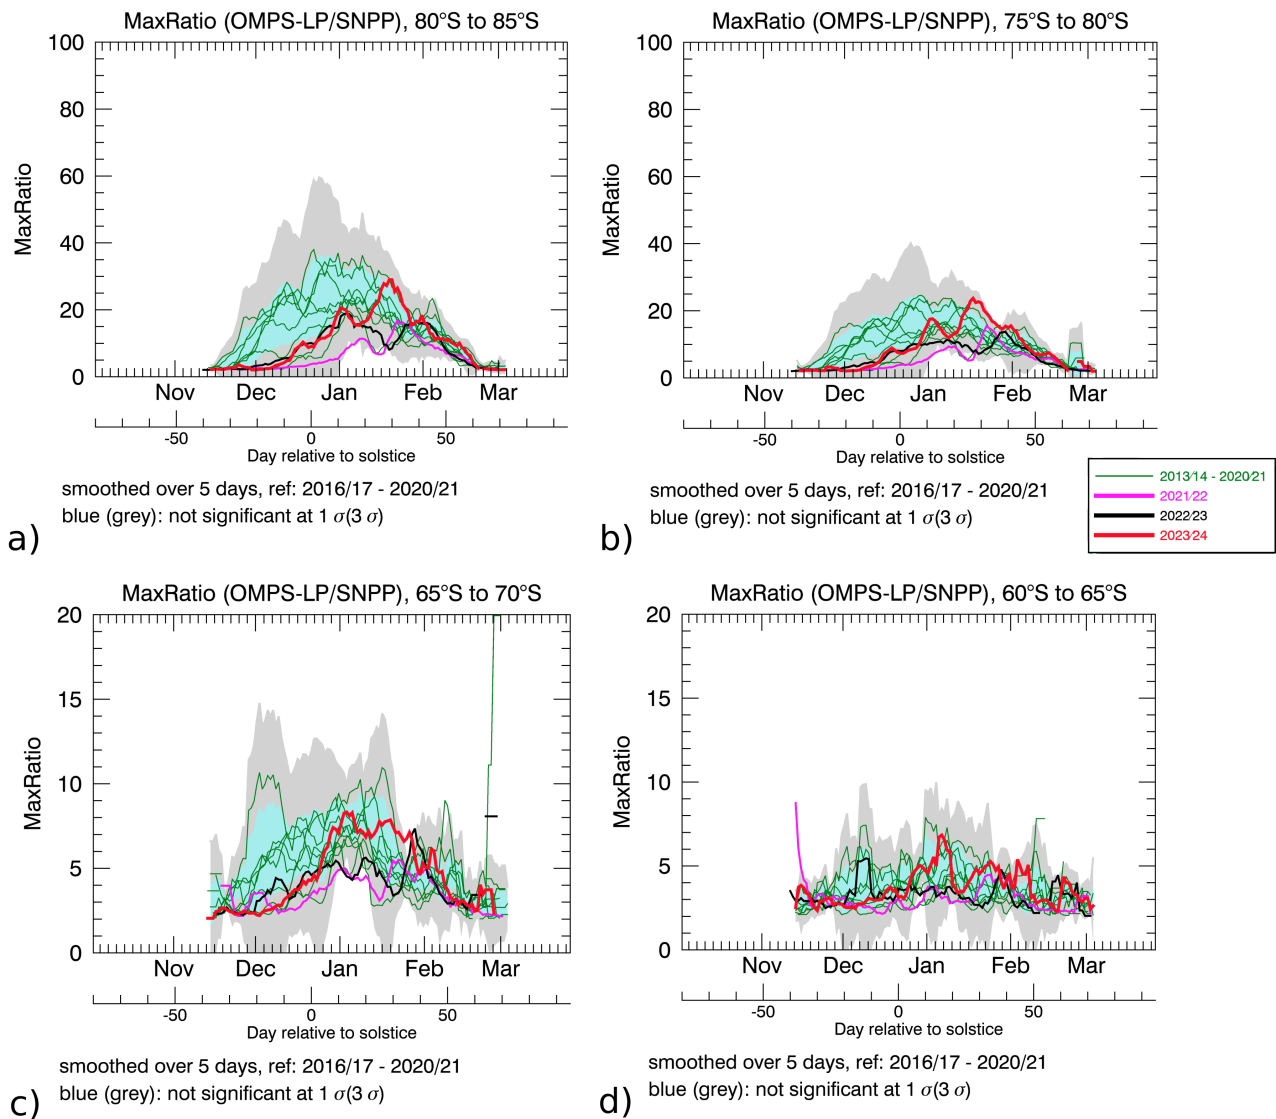

**Figure S8.** The maximum radiance ratio between the measured and background signal from OMPS-LP for each of the SH NLC seasons. The thick lines indicate zonally and daily mean maximum radiance ratios for 2021/22 (magenta), 2022/23 (black) and 2023/24 (red). All seasons before are displayed as thin green lines. The blue (grey) shaded region contains the averaged maximum radiance ratio for the years 2016/17 to 2020/21  $\pm$  one (three) standard deviations from this period. The day of solstice is December 21.

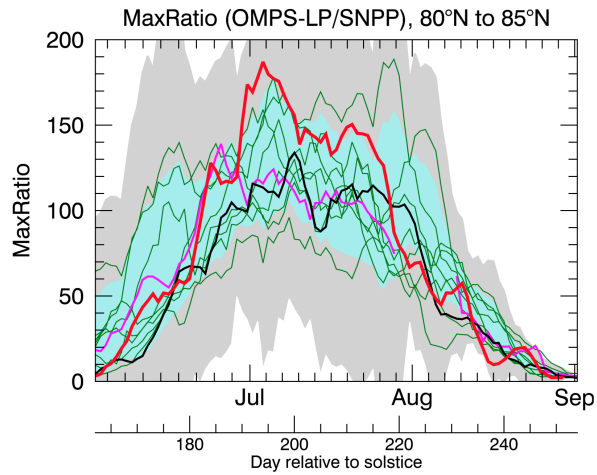

smoothed over 5 days, ref: 2017 - 2021  
 blue (grey): not significant at  $1\sigma(3\sigma)$

a)

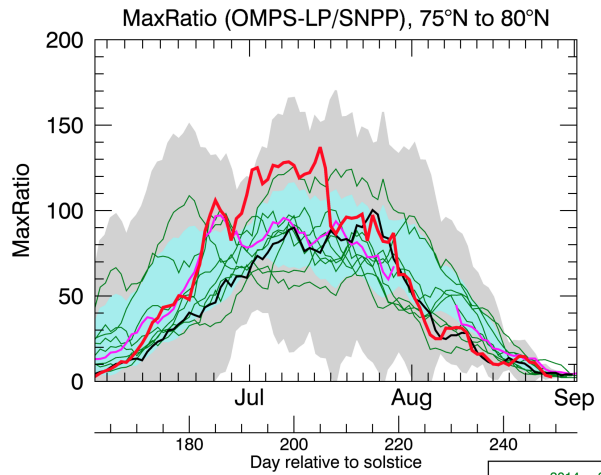

smoothed over 5 days, ref: 2017 - 2021  
 blue (grey): not significant at  $1\sigma(3\sigma)$

b)

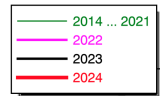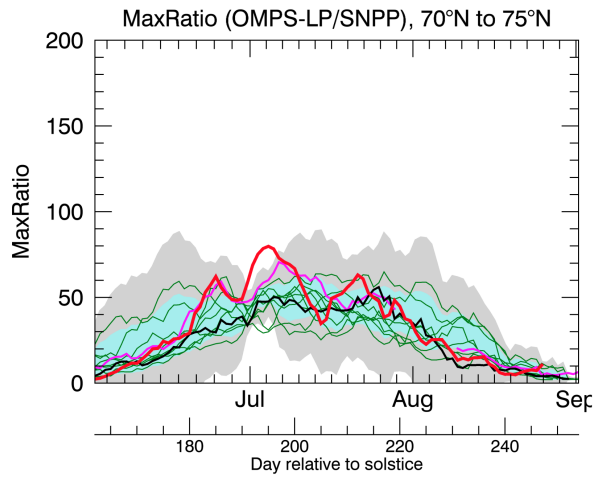

smoothed over 5 days, ref: 2017 - 2021  
 blue (grey): not significant at  $1\sigma(3\sigma)$

c)

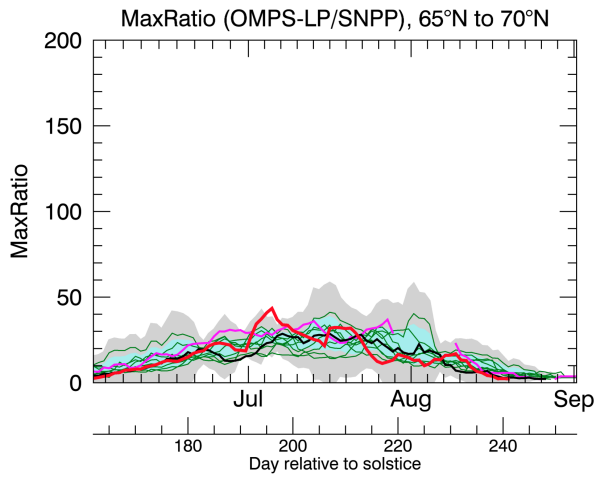

smoothed over 5 days, ref: 2017 - 2021  
 blue (grey): not significant at  $1\sigma(3\sigma)$

d)

Figure S9. The same as in Figure S8 for the NH.
